# Supplementary material for: Evaluation of Selenium Nanoparticles in Inducing Disease Resistance against Spot Blotch Disease and Promoting Growth in Wheat under Biotic Stress
Source: MDPI journal article supplement (doi:10.3390/plants12040761), 2023-02-08
Supplement: s1 [file s1]

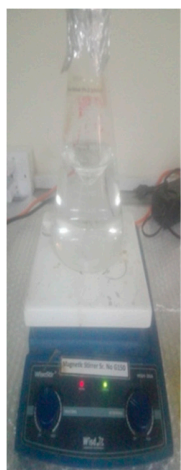

(a)

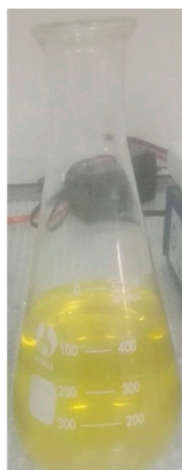

(b)

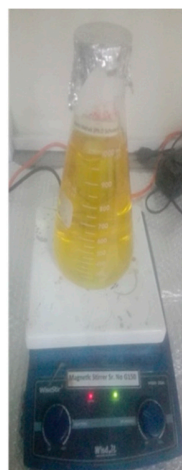

(c)

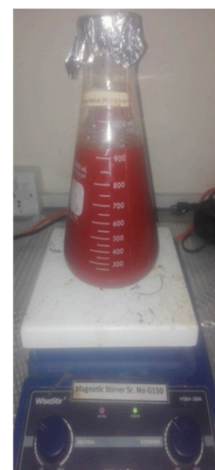

(d)

Supplementary Figure S1: Green Synthesis of Bio fabricated SeNPs (a) Stock solution, (b) Plant Extract, (c) Mixed stock solution + Plant Extract and (d) brick red color of solution confirmed the formation of SeNPs

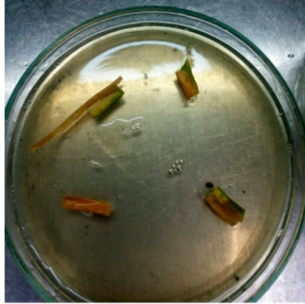

**a**

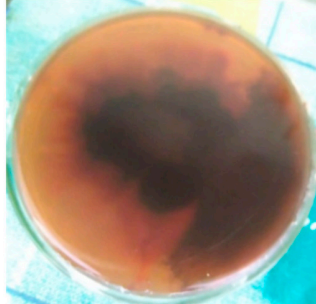

**b**

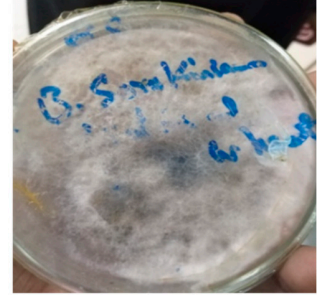

**c**

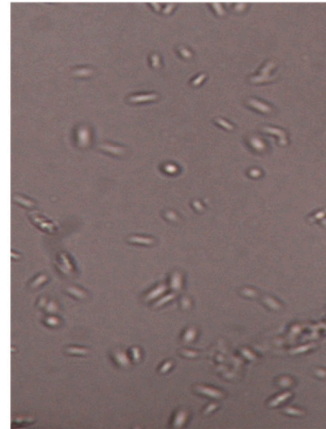

**d**

Supplementary Figure S2 :isolation and microscopic identification of *Bipolarissarokiniana* (a) infected leaves were collected, (b) Emergence of fungus on culture plate, (c) Purification of fungus, and (d) Showing conidia under microscope.

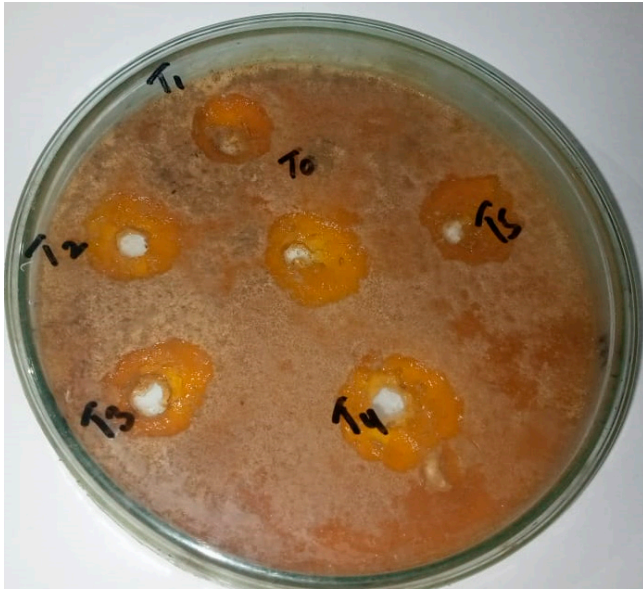

Supplementary Figure S3 : Antifungal Activity
